# Supplementary material
Source: MDPI journal article supplement (https://www.mdpi.com/2073-4344/11/9/1031)
Supplement: s1 [file s1]

# Dynamic Pyrolysis Characteristics, Kinetics and Products Analysis of Waste Tire Catalytic Pyrolysis with Ni/Fe-ZSM-5 Catalysts Using TG-IR-GC/MS

Boyu Qu <sup>1</sup>, Yulin Zhang <sup>1</sup>, Tian Wang <sup>1</sup>, Aimin Li <sup>1</sup>, Zhiqiang Wu <sup>2</sup> and Guozhao Ji <sup>1,\*</sup>

<sup>1</sup> Key Laboratory of Industrial Ecology, Environmental Engineering of Ministry of Education, School of Environmental Science and Technology, Dalian University of Technology, Linggong Road 2, Dalian 116023, China; qby\_@mail.dlut.edu.cn (B.Q.); zyl888@mail.dlut.edu.cn (Y.Z.); wt1996@mail.dlut.edu.cn (T.W.); leeam@dlut.edu.cn (A.L.)

<sup>2</sup> Industry Branch Company, State Grid Liaoning Electric Power Company Limited, 200 Zhonghua Road, Shenyang 110001, China; wzq\_syy@ln.sgcc.com.cn

\* Correspondence: guozhaoji@dlut.edu.cn

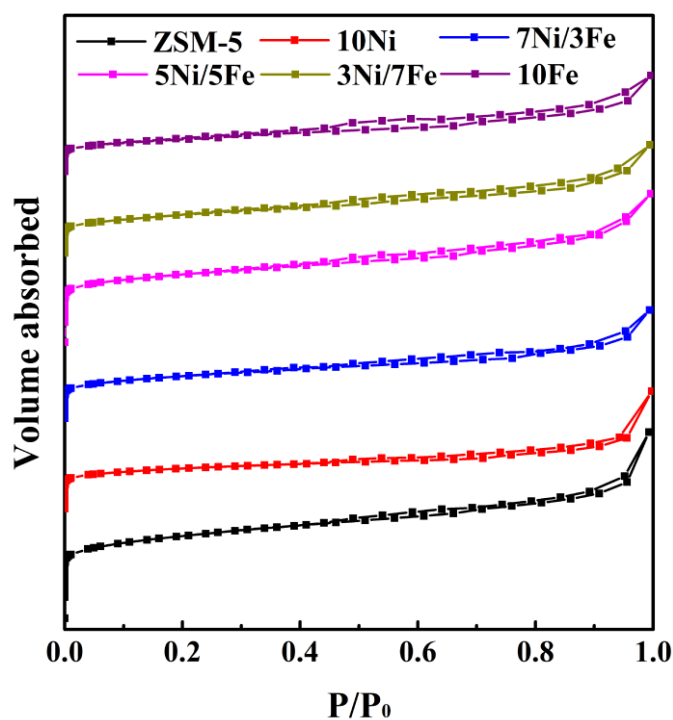

**Figure S1.** N<sub>2</sub> adsorption-desorption isotherms of parent and modified ZSM-5.

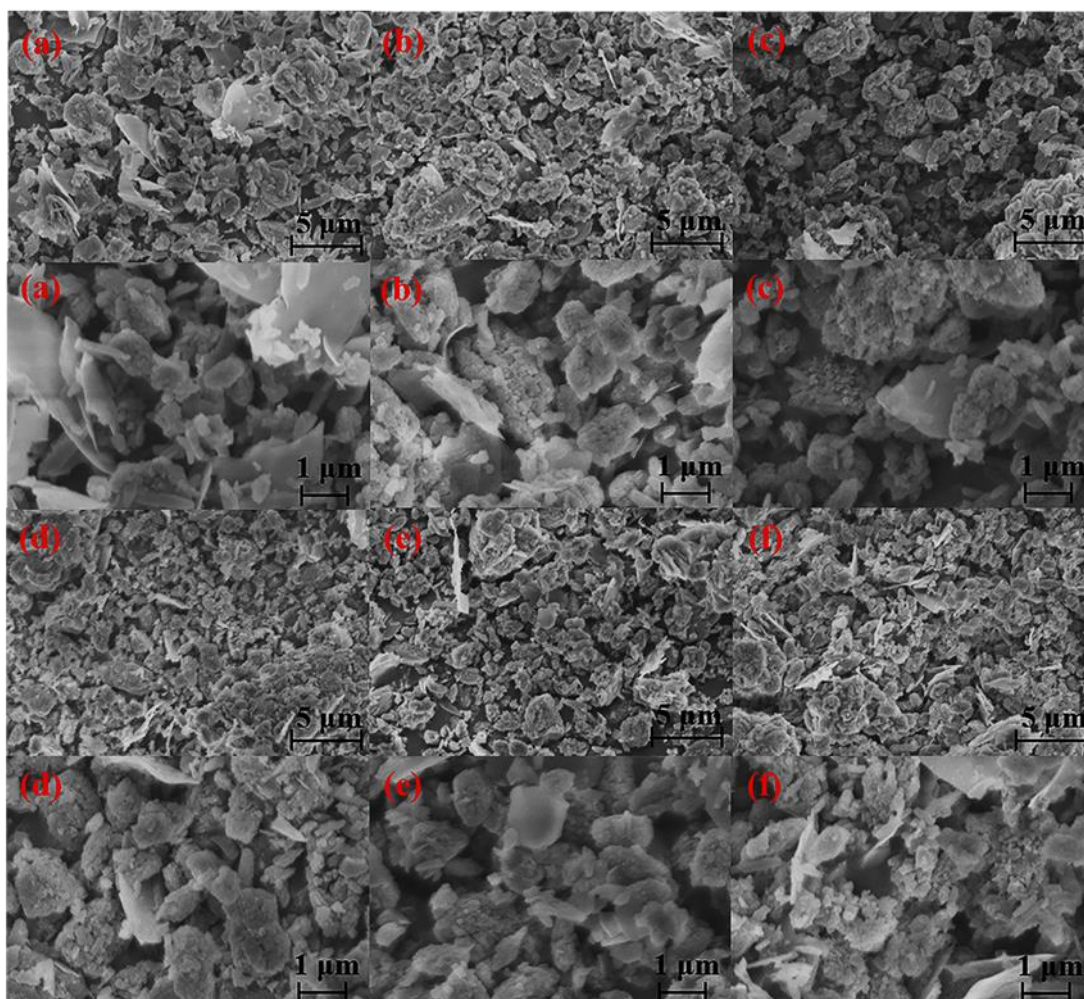

**Figure S2.** The SEM images of parent and modified catalysts (a) ZSM-5; (b) 10Ni; (c) 7Ni/3Fe; (d) 5Ni/5Fe; (e) 3Ni/7Fe; (f) 10Fe.

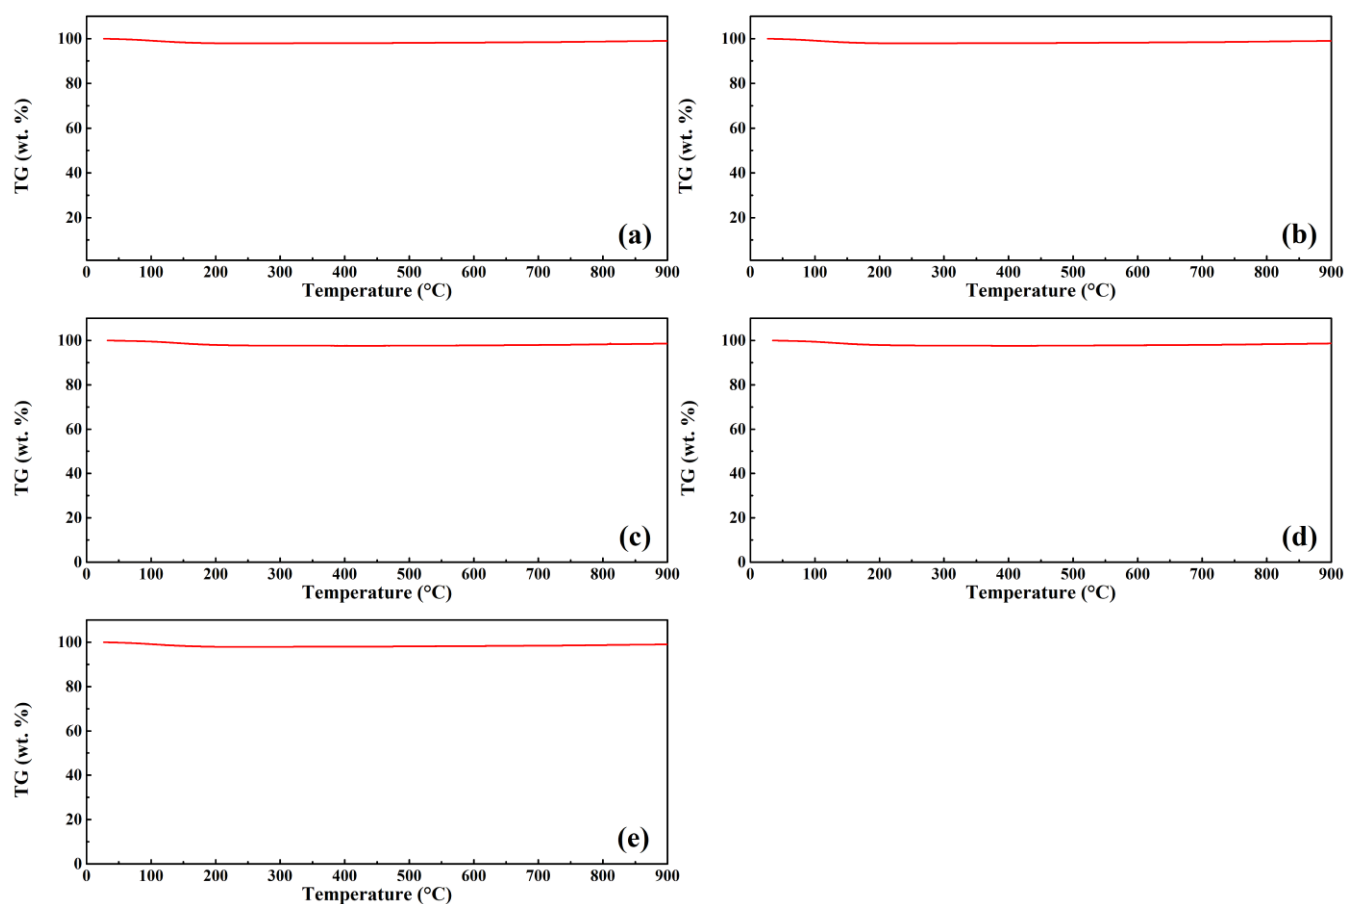

**Figure S3.** The TG curves of parent and modified catalysts heated from room temperature to 900 °C at the heating rate of 10 °C/min (a) 10Ni; (b) 7Ni/3Fe; (c) 5Ni/5Fe; (d) 3Ni/7Fe; (e) 10Fe.

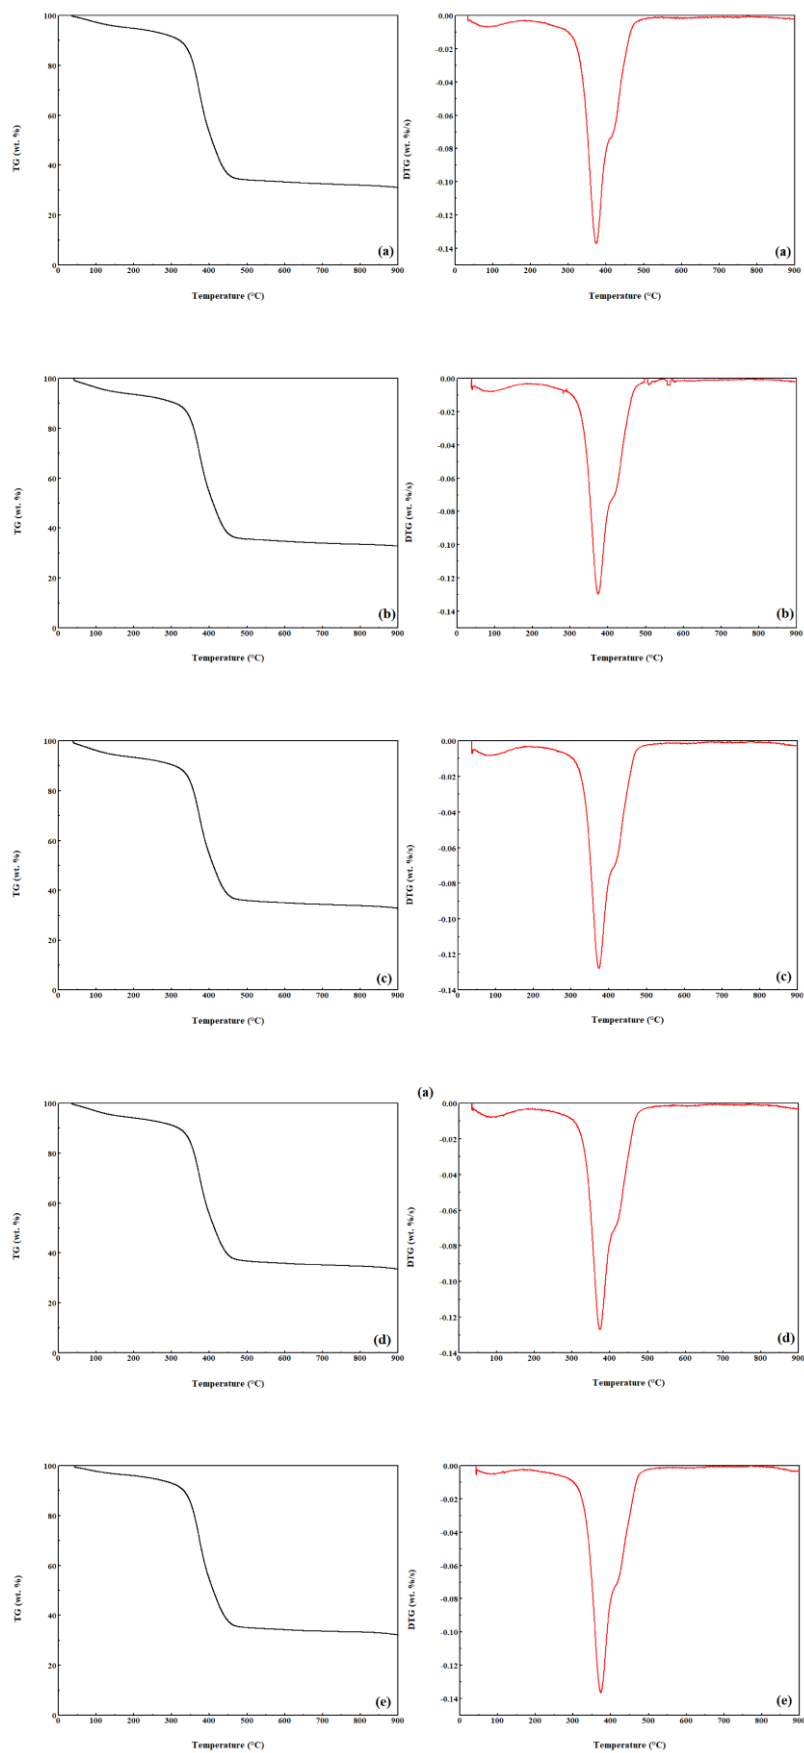

**Figure S4.** The TG and DTG curves of modified catalysts at the heating rate of 10 °C/min (a) 10Ni; (b) 7Ni/3Fe; (c) 5Ni/5Fe; (d) 3Ni/7Fe; (e) 10Fe.

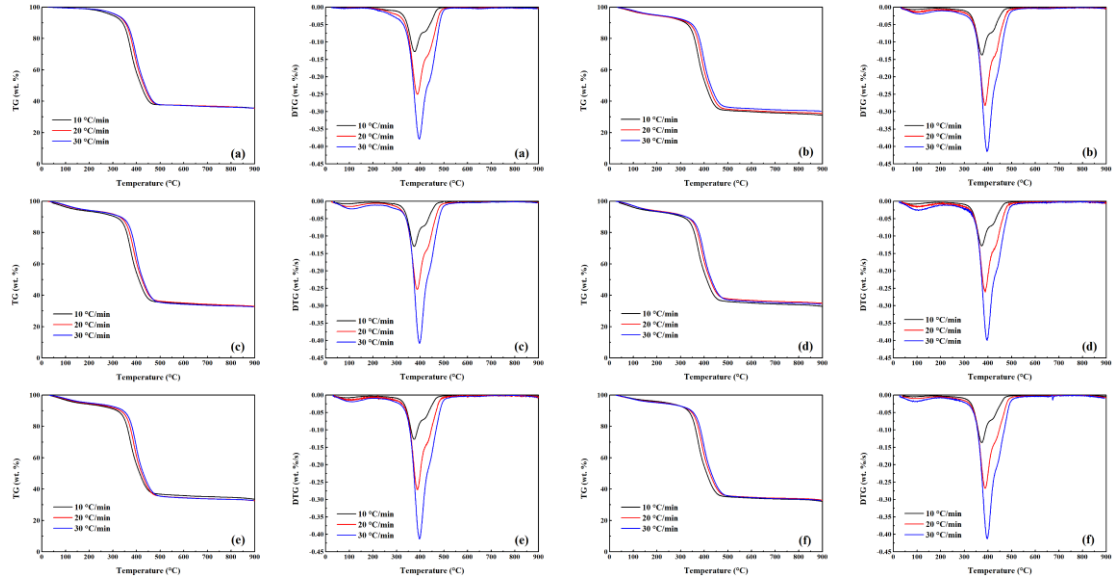

**Figure S5.** The TG and DTG curves of WT pyrolysis with no catalyst and five synthesized catalysts at three different heating rates of 10, 20 and 30 °C/min (a) No catalyst; (b) 10Ni; (c) 7Ni/3Fe; (d) 5Ni/5Fe; (e) 3Ni/7Fe; (f) 10Fe.

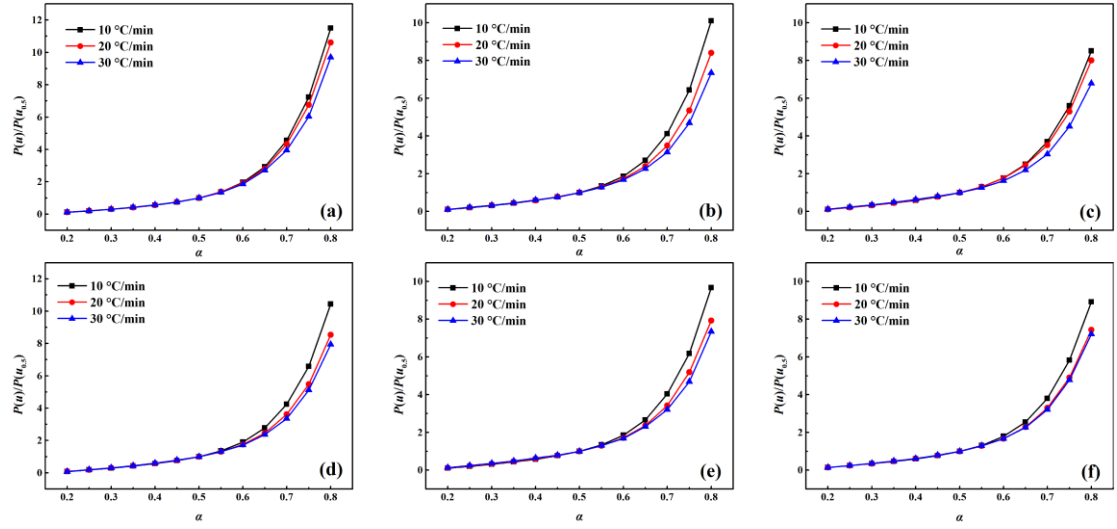

**Figure S6.**  $P(u)/P(u_{0.5})$  versus  $\alpha$  for WT pyrolysis with no catalyst and five synthesized catalysts at three different heating rates of 10, 20 and 30 °C/min (a) No catalyst; (b) 10Ni; (c) 7Ni/3Fe; (d) 5Ni/5Fe; (e) 3Ni/7Fe; (f) 10Fe.

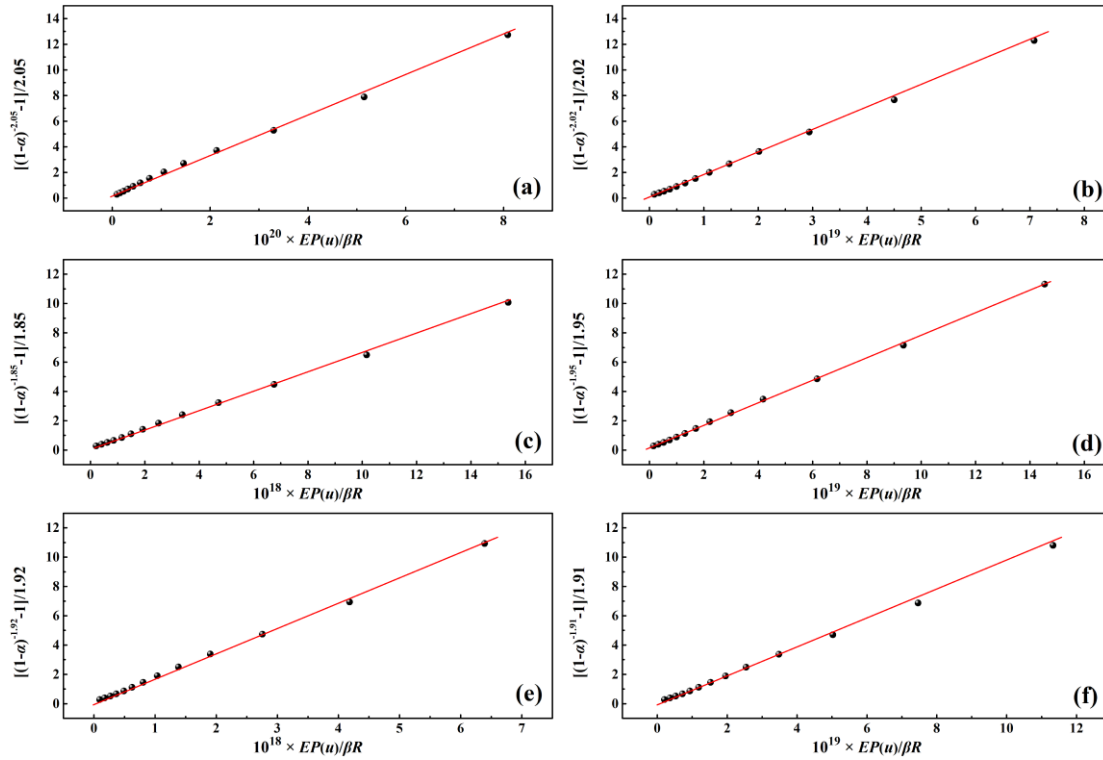

**Figure S7.** Plots of  $[(1 - \alpha)^{(1-n)} - 1]/(n - 1)$  versus  $EP(u)/\beta R$  for WT pyrolysis with no catalyst and five synthesized catalysts (a) No catalyst; (b) 10Ni; (c) 7Ni/3Fe; (d) 5Ni/5Fe; (e) 3Ni/7Fe; (f) 10Fe.

**Table S1.** Correlations of all samples with Starink's method.

| $\alpha$ | No catalyst    | 10Ni           | 7Ni/3Fe        | 5Ni/5Fe        | 3Ni/7Fe        | 10Fe           |
|----------|----------------|----------------|----------------|----------------|----------------|----------------|
|          | R <sup>2</sup> |
| 0.20     | 0.9932         | 0.9991         | 0.9983         | 0.9975         | 0.9995         | 0.9976         |
| 0.25     | 0.9946         | 0.999          | 0.9964         | 0.9994         | 0.9992         | 0.9981         |
| 0.30     | 0.9988         | 0.9996         | 0.9956         | 0.9998         | 1.0000         | 0.9988         |
| 0.35     | 0.9985         | 0.9994         | 0.9942         | 0.9999         | 0.9998         | 0.9993         |
| 0.40     | 0.9991         | 0.9986         | 0.998          | 0.9998         | 1.0000         | 0.9997         |
| 0.45     | 0.9976         | 1.0000         | 0.999          | 1.0000         | 1.0000         | 0.9983         |
| 0.50     | 0.9985         | 0.9993         | 0.9995         | 0.9999         | 0.9999         | 0.999          |
| 0.55     | 0.9956         | 0.9994         | 1.0000         | 0.9999         | 0.9999         | 0.9981         |
| 0.60     | 0.9972         | 0.9991         | 0.9987         | 1.0000         | 1.0000         | 0.9961         |
| 0.65     | 0.9980         | 0.9981         | 0.9972         | 0.9998         | 0.9995         | 0.9946         |
| 0.70     | 0.9915         | 0.9993         | 0.9947         | 1.0000         | 0.9997         | 0.9935         |
| 0.75     | 0.9894         | 0.9997         | 0.9936         | 0.9997         | 0.9998         | 0.99           |
| 0.80     | 0.9937         | 0.9998         | 0.9933         | 0.9994         | 0.9995         | 0.9897         |

**Table S2.** Correlations of all samples with KAS method.

| $\alpha$ | No catalyst    | 10Ni           | 7Ni/3Fe        | 5Ni/5Fe        | 3Ni/7Fe        | 10Fe           |
|----------|----------------|----------------|----------------|----------------|----------------|----------------|
|          | R <sup>2</sup> |
| 0.20     | 0.9932         | 0.9991         | 0.9982         | 0.9975         | 0.9995         | 0.9976         |
| 0.25     | 0.9946         | 0.999          | 0.9963         | 0.9994         | 0.9992         | 0.9981         |

|      |        |        |        |        |        |        |
|------|--------|--------|--------|--------|--------|--------|
| 0.30 | 0.9988 | 0.9996 | 0.9955 | 0.9998 | 1.0000 | 0.9988 |
| 0.35 | 0.9985 | 0.9994 | 0.9942 | 0.9999 | 0.9998 | 0.9993 |
| 0.40 | 0.9991 | 0.9986 | 0.9980 | 0.9998 | 1.0000 | 0.9997 |
| 0.45 | 0.9976 | 1.0000 | 0.9990 | 1.0000 | 1.0000 | 0.9983 |
| 0.50 | 0.9985 | 0.9993 | 0.9995 | 0.9999 | 0.9999 | 0.9990 |
| 0.55 | 0.9956 | 0.9994 | 1.0000 | 0.9999 | 0.9999 | 0.9981 |
| 0.60 | 0.9971 | 0.9991 | 0.9987 | 1.0000 | 1.0000 | 0.9961 |
| 0.65 | 0.9980 | 0.9981 | 0.9972 | 0.9998 | 0.9995 | 0.9945 |
| 0.70 | 0.9915 | 0.9993 | 0.9946 | 1.0000 | 0.9997 | 0.9935 |
| 0.75 | 0.9894 | 0.9997 | 0.9936 | 0.9997 | 0.9998 | 0.9899 |
| 0.80 | 0.9937 | 0.9998 | 0.9933 | 0.9994 | 0.9995 | 0.9897 |

**Table S3.** Activation energies of all samples with KAS method.

| $\alpha$ | No catalyst  | 10Ni         | 7Ni/3Fe      | 5Ni/5Fe      | 3Ni/7Fe      | 10Fe         |
|----------|--------------|--------------|--------------|--------------|--------------|--------------|
|          | $E$ (kJ/mol) |
| 0.20     | 213.40       | 184.13       | 161.56       | 190.93       | 152.85       | 196.66       |
| 0.25     | 215.74       | 180.55       | 169.90       | 181.62       | 161.42       | 182.51       |
| 0.30     | 212.23       | 185.51       | 177.07       | 185.52       | 169.11       | 180.38       |
| 0.35     | 215.07       | 185.68       | 176.19       | 184.22       | 173.29       | 177.24       |
| 0.40     | 215.31       | 187.06       | 176.79       | 186.39       | 174.36       | 182.30       |
| 0.45     | 217.76       | 195.99       | 181.58       | 188.71       | 185.16       | 180.69       |
| 0.50     | 217.45       | 193.51       | 188.34       | 193.38       | 191.59       | 185.18       |
| 0.55     | 220.22       | 202.38       | 193.95       | 199.43       | 197.37       | 187.05       |
| 0.60     | 229.35       | 213.59       | 204.51       | 213.75       | 210.93       | 199.60       |
| 0.65     | 233.73       | 231.93       | 213.40       | 227.68       | 223.43       | 209.71       |
| 0.70     | 248.02       | 257.23       | 228.28       | 247.39       | 329.29       | 220.69       |
| 0.75     | 258.35       | 271.15       | 233.67       | 253.24       | 260.05       | 227.97       |
| 0.80     | 257.36       | 271.69       | 235.28       | 260.64       | 261.53       | 231.88       |
| Ave      | 227.23       | 212.34       | 195.43       | 208.68       | 206.95       | 197.07       |
